# Supplementary material for: Enhancement of Palmarumycin C12 and C13 Production by the Endophytic Fungus Berkleasmium sp. Dzf12 in an Aqueous-Organic Solvent System
Source: Molecules. 2015 Nov 12;20(11):20320–33. doi: 10.3390/molecules201119700 (PMC6331930; doi:10.3390/molecules201119700)
Supplement: Supplementary file 1 [file molecules-20-19700-s001.pdf]

# Supplementary Materials: Enhancement of Palmarumycin C<sub>12</sub> and C<sub>13</sub> Production by the Endophytic Fungus *Berkleasmium* sp. Dzf12 in an Aqueous-Organic Solvent System

Yan Mou, Dan Xu, Ziling Mao, Xuejiao Dong, Fengke Lin, Ali Wang, Daowan Lai, Ligang Zhou and Bingyan Xie

**Table S1.** Effects of seven organic solvents on mycelia growth in liquid culture of *Berkleasmium* sp. Dzf12.

| Treatment           | Mycelia biomass (g dw/L) |                      |               |                 |                   |              |             |
|---------------------|--------------------------|----------------------|---------------|-----------------|-------------------|--------------|-------------|
|                     | <i>n</i> -Dodecane       | <i>n</i> -Hexadecane | 1-Hexadecene  | Liquid Paraffin | Dibutyl Phthalate | Butyl Oleate | Oleic Acid  |
| CK                  | 6.6 ± 0.6a               | 6.6 ± 0.4c           | 6.2 ± 0.4f    | 6.7 ± 0.6d      | 6.5 ± 0.6a        | 6.6 ± 0.5a   | 6.7 ± 0.3a  |
| 5% added on day 0   | 6.4 ± 0.4a               | 8.5 ± 0.6a           | 8.8 ± 0.3ab   | 8.8 ± 0.5ab     | 7.3 ± 0.4a        | 6.8 ± 0.3a   | 7.3 ± 0.4a  |
| 10% added on day 0  | 6.3 ± 0.3a               | 8.7 ± 0.4a           | 8.5 ± 0.6abcd | 9.7 ± 0.5a      | 7.7 ± 0.2a        | 7.0 ± 0.3a   | 7.0 ± 0.7a  |
| 15% added on day 0  | 7.0 ± 0.2a               | 8.4 ± 0.2ab          | 7.5 ± 0.5cde  | 9.6 ± 0.4a      | 7.1 ± 0.2a        | 7.1 ± 0.4a   | 7.1 ± 0.4a  |
| 5% added on day 3   | 6.8 ± 0.8a               | 7.1 ± 0.4bc          | 9.2 ± 0.3ab   | 9.0 ± 0.2ab     | 7.7 ± 0.4a        | 6.7 ± 0.4a   | 7.0 ± 0.5a  |
| 10% added on day 3  | 6.3 ± 0.3a               | 7.6 ± 0.3abc         | 9.1 ± 0.3ab   | 9.2 ± 0.4ab     | 7.1 ± 0.7a        | 6.8 ± 0.7a   | 7.1 ± 0.5a  |
| 15% added on day 3  | 6.2 ± 0.5a               | 7.9 ± 0.4abc         | 8.1 ± 0.5bcde | 8.3 ± 0.6abc    | 7.1 ± 0.5a        | 7.2 ± 0.4a   | 6.5 ± 0.5a  |
| 5% added on day 6   | 7.5 ± 0.4a               | 6.8 ± 0.4c           | 9.6 ± 0.2a    | 9.7 ± 0.5a      | 7.5 ± 0.1a        | 7.5 ± 0.3a   | 6.7 ± 0.5a  |
| 10% added on day 6  | 7.0 ± 0.6a               | 7.1 ± 0.2bc          | 9.0 ± 0.3ab   | 8.3 ± 0.2abc    | 7.1 ± 0.2a        | 7.0 ± 0.4a   | 6.4 ± 0.4a  |
| 15% added on day 6  | 6.8 ± 0.4a               | 6.6 ± 0.6c           | 9.0 ± 0.2ab   | 7.9 ± 0.3bcd    | 7.7 ± 0.3a        | 6.8 ± 0.2a   | 6.1 ± 0.3a  |
| 5% added on day 9   | 7.1 ± 0.4a               | 7.6 ± 0.1abc         | 8.9 ± 0.2ab   | 8.8 ± 0.4ab     | 7.0 ± 0.3a        | 6.9 ± 0.5a   | 6.4 ± 0.2a  |
| 10% added on day 9  | 6.7 ± 0.6a               | 7.3 ± 0.7abc         | 8.6 ± 0.6abc  | 8.8 ± 0.4ab     | 6.8 ± 0.4a        | 6.8 ± 0.3a   | 6.2 ± 0.35a |
| 15% added on day 9  | 7.0 ± 0.6a               | 7.1 ± 0.2bc          | 8.5 ± 0.4abcd | 8.1 ± 0.5bcd    | 6.9 ± 0.3a        | 6.8 ± 0.2a   | 6.2 ± 0.2a  |
| 5% added on day 12  | 6.9 ± 0.9a               | 6.7 ± 0.2c           | 7.3 ± 0.4def  | 8.0 ± 0.3bcd    | 6.7 ± 0.5a        | 6.7 ± 0.3a   | 6.4 ± 0.6a  |
| 10% added on day 12 | 6.8 ± 0.3a               | 6.6 ± 0.3c           | 7.1 ± 0.6ef   | 6.8 ± 0.2d      | 6.6 ± 0.4a        | 6.7 ± 0.3a   | 6.8 ± 0.6a  |
| 15% added on day 12 | 6.0 ± 0.5a               | 6.6 ± 0.5c           | 7.0 ± 0.3ef   | 7.1 ± 0.5cd     | 6.6 ± 0.6a        | 6.8 ± 0.4a   | 6.6 ± 0.3a  |

Note: The organic solvents were applied at 5%, 10% and 15% on days 0, 3, 6, 9 and 12 of culture, respectively. The period of culture lasted for 15 days. "CK" means the control without any organic solvents. The values are expressed as means ± standard deviations (*n* = 3). Different letters indicate significant differences among the treatments in each column at *p* ≤ 0.05.

**Table S2.** Effects of dibutyl phthalate on palmarumycin production in liquid culture of *Berkleasium* sp. Dzfl2.

| Treatment           | C12 Yield in Mycelia (mg/L) | C12 Yield in Aqueous Phase (mg/L) | C12 Yield in Organic Phase (mg/L) | C13 Yield in Mycelia (mg/L) | C13 Yield in Aqueous Phase (mg/L) | C13 Yield in Organic Phase (mg/L) | C12 Yield (mg/L) | C13 Yield (mg/L) | C12 Plus C13 Yield (mg/L) |
|---------------------|-----------------------------|-----------------------------------|-----------------------------------|-----------------------------|-----------------------------------|-----------------------------------|------------------|------------------|---------------------------|
| CK                  | 5.0 ± 0.6cd                 | nd                                | -                                 | 9.2 ± 1.0a                  | 20.4 ± 1.9a                       | -                                 | 5.0              | 29.6             | 34.6                      |
| 5% added on day 0   | 2.1 ± 0.5d                  | nd                                | 148.5 ± 15.3a                     | 0.0 ± 0.0e                  | nd                                | nd                                | 150.6            | 0.0              | 150.6                     |
| 10% added on day 0  | 5.6 ± 0.7cd                 | nd                                | 100.8 ± 8.3bcde                   | 0.0 ± 0.0e                  | nd                                | nd                                | 106.4            | 0.0              | 106.4                     |
| 15% added on day 0  | 2.5 ± 1.0d                  | nd                                | 58.0 ± 16.2fg                     | 0.0 ± 0.0e                  | nd                                | nd                                | 60.5             | 0.0              | 60.5                      |
| 5% added on day 3   | 5.2 ± 1.9cd                 | nd                                | 129.7 ± 8.8ab                     | 0.8 ± 0.1cde                | nd                                | nd                                | 134.9            | 0.8              | 135.6                     |
| 10% added on day 3  | 6.1 ± 0.8cd                 | nd                                | 107.2 ± 14.0bcd                   | 0.7 ± 0.1cde                | nd                                | nd                                | 113.2            | 0.7              | 113.9                     |
| 15% added on day 3  | 7.0 ± 1.3bcd                | nd                                | 87.1 ± 7.6cdef                    | 0.7 ± 0.1cde                | nd                                | nd                                | 94.1             | 0.7              | 94.7                      |
| 5% added on day 6   | 6.1 ± 0.9cd                 | nd                                | 114.0 ± 6.5bc                     | 0.5 ± 0.1de                 | nd                                | nd                                | 120.1            | 0.5              | 120.5                     |
| 10% added on day 6  | 11.3 ± 3.2ab                | nd                                | 77.2 ± 9.6def                     | 0.8 ± 0.1cde                | nd                                | nd                                | 88.5             | 0.8              | 89.4                      |
| 15% added on day 6  | 14.7 ± 2.0a                 | nd                                | 58.6 ± 12.9fg                     | 1.8 ± 0.2b                  | nd                                | nd                                | 73.3             | 1.8              | 75.1                      |
| 5% added on day 9   | 4.0 ± 0.7cd                 | nd                                | 94.5 ± 10.8cde                    | 0.0 ± 0.0e                  | nd                                | nd                                | 98.4             | 0.0              | 98.5                      |
| 10% added on day 9  | 8.7 ± 2.7bc                 | nd                                | 68.8 ± 15.1efg                    | 1.5 ± 0.1bc                 | nd                                | nd                                | 77.5             | 1.5              | 79.0                      |
| 15% added on day 9  | 4.5 ± 1.5cd                 | nd                                | 40.3 ± 12.6g                      | 0.2 ± 0.1e                  | nd                                | nd                                | 44.7             | 0.2              | 44.9                      |
| 5% added on day 12  | 3.6 ± 0.4cd                 | nd                                | 52.7 ± 6.6fg                      | 2.1 ± 0.3b                  | nd                                | nd                                | 56.3             | 2.1              | 58.4                      |
| 10% added on day 12 | 8.0 ± 1.4bc                 | nd                                | 34.8 ± 8.3g                       | 1.4 ± 0.2cde                | nd                                | nd                                | 42.8             | 1.4              | 44.2                      |
| 15% added on day 12 | 3.8 ± 1.5cd                 | nd                                | 34.1 ± 4.0g                       | 0.2 ± 0.2e                  | nd                                | nd                                | 37.9             | 0.2              | 38.0                      |

Note: Dibutyl phthalate was applied at 5%, 10% and 15% on days 0, 3, 6, 9 and 12 of culture, respectively. The period of culture lasted for 15 days. "C12" means palmarumycin C<sub>12</sub>, "C13" means palmarumycin C<sub>13</sub>. "CK" means the control without any organic solvents. "-" means not applicable. "nd" means not detectable. The values are expressed as means ± standard deviations (*n* = 3). Different letters indicate significant differences among the treatments in each column at *p* ≤ 0.05.

**Table S3.** Effects of butyl oleate on palmarumycin production in liquid culture of *Berkleasium* sp. Dzf12.

| Treatment           | C12 Yield in Mycelia (mg/L) | C12 Yield in Aqueous Phase (mg/L) | C12 Yield in Organic Phase (mg/L) | C13 Yield in Mycelia (mg/L) | C13 Yield in Aqueous Phase (mg/L) | C13 Yield in Organic Phase (mg/L) | C12 Yield (mg/L) | C13 Yield (mg/L) | C12 Plus C13 Yield (mg/L) |
|---------------------|-----------------------------|-----------------------------------|-----------------------------------|-----------------------------|-----------------------------------|-----------------------------------|------------------|------------------|---------------------------|
| CK                  | 5.3 ± 2.0c                  | nd                                | -                                 | 7.6 ± 2.9a                  | 24.6 ± 4.5a                       | -                                 | 5.3              | 32.1             | 37.5                      |
| 5% added on day 0   | 3.5 ± 1.7c                  | 3.2 ± 3.8bc                       | 177.3 ± 9.5a                      | 0.3 ± 0.0d                  | nd                                | nd                                | 184.0            | 0.3              | 184.4                     |
| 10% added on day 0  | 3.2 ± 0.9c                  | 4.9 ± 1.0abc                      | 132.3 ± 8.4bcd                    | 0.2 ± 0.0d                  | nd                                | nd                                | 140.4            | 0.2              | 140.6                     |
| 15% added on day 0  | 4.1 ± 0.9c                  | 3.6 ± 3.0bc                       | 116.1 ± 12.5cde                   | 0.1 ± 0.1d                  | nd                                | nd                                | 123.8            | 0.1              | 123.9                     |
| 5% added on day 3   | 23.2 ± 4.9ab                | 14.8 ± 3.3ab                      | 153.5 ± 8.7ab                     | 1.0 ± 0.2cd                 | nd                                | nd                                | 191.6            | 1.0              | 192.5                     |
| 10% added on day 3  | 34.2 ± 5.5a                 | 16.9 ± 3.9a                       | 139.4 ± 10.1bc                    | 1.5 ± 0.4bcd                | nd                                | nd                                | 190.4            | 1.5              | 191.9                     |
| 15% added on day 3  | 23.6 ± 7.0ab                | 16.7 ± 5.9a                       | 127.6 ± 7.6bcd                    | 0.8 ± 0.1d                  | nd                                | nd                                | 167.8            | 0.8              | 168.6                     |
| 5% added on day 6   | 17.1 ± 6.6bc                | nd                                | 136.3 ± 6.7bc                     | 2.3 ± 0.4bcd                | nd                                | nd                                | 153.3            | 2.3              | 155.6                     |
| 10% added on day 6  | 25.3 ± 4.8ab                | nd                                | 116.4 ± 7.1cde                    | 2.1 ± 0.3bcd                | nd                                | nd                                | 141.8            | 2.1              | 143.9                     |
| 15% added on day 6  | 21.4 ± 5.7ab                | nd                                | 82.5 ± 9.4f                       | 0.9 ± 0.0cd                 | nd                                | nd                                | 103.9            | 0.9              | 104.8                     |
| 5% added on day 9   | 30.2 ± 5.4ab                | nd                                | 103.3 ± 5.9def                    | 1.2 ± 0.1bcd                | nd                                | nd                                | 133.5            | 1.2              | 134.7                     |
| 10% added on day 9  | 26.1 ± 6.0ab                | nd                                | 89.7 ± 17.2ef                     | 1.6 ± 0.1bcd                | nd                                | nd                                | 115.8            | 1.6              | 117.3                     |
| 15% added on day 9  | 24.8 ± 2.8ab                | nd                                | 73.0 ± 11.1f                      | 1.9 ± 0.1bcd                | nd                                | nd                                | 97.7             | 1.9              | 99.7                      |
| 5% added on day 12  | 19.2 ± 2.0abc               | nd                                | 34.9 ± 5.0g                       | 3.6 ± 0.3b                  | nd                                | nd                                | 54.1             | 3.6              | 57.7                      |
| 10% added on day 12 | 21.9 ± 6.8ab                | nd                                | 31.0 ± 13.3g                      | 3.4 ± 0.3bc                 | nd                                | nd                                | 52.9             | 3.4              | 56.3                      |
| 15% added on day 12 | 21.8 ± 5.9ab                | nd                                | 25.8 ± 8.6gh                      | 3.6 ± 0.2b                  | nd                                | nd                                | 47.6             | 3.6              | 51.2                      |

Note: Butyl oleate was applied at 5%, 10% and 15% on days 0, 3, 6, 9 and 12 of culture, respectively. The period of culture lasted for 15 days. "C12" means palmarumycin C<sub>12</sub>, "C13" means palmarumycin C<sub>13</sub>. "CK" means the control without any organic solvents. "-" means not applicable. "nd" means not detectable. The values are expressed as means ± standard deviations (*n* = 3). Different letters indicate significant differences among the treatments in each column at *p* ≤ 0.05.

**Table S4.** Effects of oleic acid on palmarumycin production in liquid culture of *Berkleasium* sp. Dzf12.

| Treatment           | C12 Yield in Mycelia (mg/L) | C12 Yield in Aqueous Phase (mg/L) | C12 Yield in Organic Phase (mg/L) | C13 Yield in Mycelia (mg/L) | C13 Yield in Aqueous Phase (mg/L) | C13 Yield in Organic Phase (mg/L) | C12 Yield (mg/L) | C13 Yield (mg/L) | C12 Plus C13 Yield (mg/L) |
|---------------------|-----------------------------|-----------------------------------|-----------------------------------|-----------------------------|-----------------------------------|-----------------------------------|------------------|------------------|---------------------------|
| CK                  | 3.9 ± 1.2d                  | nd                                | -                                 | 8.5 ± 2.8a                  | 25.3 ± 5.2a                       | -                                 | 3.9              | 33.8             | 37.8                      |
| 5% added on day 0   | 22.4 ± 4.3bc                | 36.6 ± 4.6abc                     | 125.6 ± 10.1a                     | 0.1 ± 0.0b                  | nd                                | nd                                | 184.6            | 0.1              | 184.7                     |
| 10% added on day 0  | 32.8 ± 3.6ab                | 36.9 ± 6.8abc                     | 93.6 ± 7.3bc                      | 0.5 ± 0.1b                  | nd                                | nd                                | 163.3            | 0.5              | 163.8                     |
| 15% added on day 0  | 45.5 ± 8.1a                 | 31.6 ± 3.4bcd                     | 75.4 ± 5.5bcd                     | 0.4 ± 0.1b                  | nd                                | nd                                | 152.5            | 0.4              | 152.9                     |
| 5% added on day 3   | 32.7 ± 5.2ab                | 26.2 ± 3.8cd                      | 103.7 ± 11.2ab                    | 0.3 ± 0.1b                  | nd                                | nd                                | 162.6            | 0.3              | 162.9                     |
| 10% added on day 3  | 24.4 ± 4.9bc                | 27.7 ± 4.9bcd                     | 96.3 ± 13.2bc                     | 0.6 ± 0.3b                  | nd                                | nd                                | 148.4            | 0.6              | 148.9                     |
| 15% added on day 3  | 25.3 ± 7.4bc                | 44.6 ± 7.8ab                      | 85.6 ± 8.3bcd                     | 0.1 ± 0.0b                  | nd                                | nd                                | 155.4            | 0.1              | 155.5                     |
| 5% added on day 6   | 14.9 ± 4.4bcd               | 39.5 ± 6.3abc                     | 98.0 ± 10.2b                      | 0.3 ± 0.1b                  | nd                                | nd                                | 152.4            | 0.3              | 152.7                     |
| 10% added on day 6  | 14.9 ± 3.7bcd               | 48.7 ± 4.1a                       | 67.8 ± 6.8cd                      | 0.1 ± 0.1b                  | nd                                | nd                                | 131.3            | 0.1              | 131.5                     |
| 15% added on day 6  | 17.2 ± 5.7bcd               | 37.2 ± 5.6abc                     | 56.0 ± 10.2d                      | 0.5 ± 0.2b                  | nd                                | nd                                | 110.4            | 0.5              | 110.8                     |
| 5% added on day 9   | 48.2 ± 7.6a                 | 32.4 ± 4.0abcd                    | 85.0 ± 7.5bcd                     | 0.9 ± 0.3b                  | nd                                | nd                                | 165.6            | 0.9              | 166.4                     |
| 10% added on day 9  | 44.9 ± 5.1a                 | 44.0 ± 6.2ab                      | 83.1 ± 9.0bcd                     | 1.5 ± 0.6b                  | nd                                | nd                                | 172.0            | 1.5              | 173.5                     |
| 15% added on day 9  | 44.7 ± 6.4a                 | 34.7 ± 4.2abc                     | 67.7 ± 11.0cd                     | 1.0 ± 0.5b                  | nd                                | nd                                | 147.0            | 1.0              | 148.0                     |
| 5% added on day 12  | 12.5 ± 3.3cd                | 17.1 ± 2.9d                       | 26.1 ± 6.1e                       | 9.9 ± 2.3a                  | nd                                | nd                                | 55.7             | 9.9              | 65.5                      |
| 10% added on day 12 | 15.3 ± 4.2bcd               | 28.5 ± 4.7bcd                     | 25.9 ± 7.3e                       | 10.1 ± 3.0a                 | nd                                | nd                                | 69.7             | 10.2             | 79.8                      |
| 15% added on day 12 | 15.4 ± 5.2bcd               | 27.7 ± 4.4bcd                     | 24.3 ± 8.5e                       | 8.1 ± 2.5a                  | nd                                | nd                                | 67.4             | 8.1              | 75.5                      |

Note: Oleic acid was applied at 5%, 10% and 15% on days 0, 3, 6, 9 and 12 of culture, respectively. The period of culture lasted for 15 days. "C12" means palmarumycin C<sub>12</sub>, "C13" means palmarumycin C<sub>13</sub>. "CK" means the control without any organic solvents. "-" means not applicable. "nd" means not detectable. The values are expressed as means ± standard deviations (*n* = 3). Different letters indicate significant differences among the treatments in each column at *p* ≤ 0.05.

**Table S5.** Effects of *n*-dodecane on palmarumycin production in liquid culture of *Berkleasium* sp. Dzf12.

| Treatment           | C12 Yield in Mycelia (mg/L) | C12 Yield in Aqueous Phase (mg/L) | C12 Yield in Organic Phase (mg/L) | C13 Yield in Mycelia (mg/L) | C13 Yield in Aqueous Phase (mg/L) | C13 Yield in Organic Phase (mg/L) | C12 Yield (mg/L) | C13 Yield (mg/L) | C12 Plus C13 Yield (mg/L) |
|---------------------|-----------------------------|-----------------------------------|-----------------------------------|-----------------------------|-----------------------------------|-----------------------------------|------------------|------------------|---------------------------|
| CK                  | 5.8 ± 2.0bc                 | nd                                | -                                 | 6.5 ± 2.2d                  | 23.7 ± 6.3abc                     | -                                 | 5.8              | 30.1             | 35.9                      |
| 5% added on day 0   | 5.8 ± 2.3bc                 | nd                                | nd                                | 23.6 ± 4.6bc                | 47.4 ± 10.2a                      | nd                                | 5.8              | 71.0             | 76.7                      |
| 10% added on day 0  | 5.9 ± 2.0bc                 | nd                                | nd                                | 29.0 ± 5.2b                 | 45.5 ± 8.2a                       | nd                                | 5.9              | 74.4             | 80.3                      |
| 15% added on day 0  | 7.2 ± 3.1bc                 | nd                                | nd                                | 30.9 ± 3.2b                 | 41.1 ± 6.2abc                     | nd                                | 7.2              | 72.0             | 79.2                      |
| 5% added on day 3   | 16.5 ± 4.9a                 | nd                                | nd                                | 44.1 ± 9.4a                 | 43.7 ± 5.4ab                      | nd                                | 16.5             | 87.8             | 104.3                     |
| 10% added on day 3  | 10.3 ± 4.0ab                | nd                                | nd                                | 10.1 ± 2.2cd                | 38.3 ± 12.1abc                    | nd                                | 10.3             | 48.4             | 58.7                      |
| 15% added on day 3  | 10.7 ± 2.7ab                | nd                                | nd                                | 11.4 ± 4.6cd                | 35.2 ± 7.9abc                     | nd                                | 10.7             | 46.6             | 57.2                      |
| 5% added on day 6   | 6.9 ± 2.1bc                 | nd                                | nd                                | 17.7 ± 7.2bc                | 36.7 ± 6.6abc                     | nd                                | 6.9              | 54.4             | 61.3                      |
| 10% added on day 6  | 4.3 ± 2.0bc                 | nd                                | nd                                | 7.0 ± 2.6d                  | 31.7 ± 4.2abc                     | nd                                | 4.3              | 38.7             | 43.0                      |
| 15% added on day 6  | 3.9 ± 2.1bc                 | nd                                | nd                                | 5.0 ± 2.0d                  | 21.2 ± 8.3bc                      | nd                                | 3.9              | 26.2             | 30.1                      |
| 5% added on day 9   | 1.7 ± 0.9c                  | nd                                | nd                                | 8.9 ± 2.9d                  | 17.0 ± 6.2c                       | nd                                | 1.7              | 25.9             | 27.6                      |
| 10% added on day 9  | 1.3 ± 0.7c                  | nd                                | nd                                | 8.5 ± 2.0d                  | 19.3 ± 3.2c                       | nd                                | 1.3              | 27.8             | 29.1                      |
| 15% added on day 9  | 1.5 ± 1.0c                  | nd                                | nd                                | 6.2 ± 3.0d                  | 21.4 ± 4.0bc                      | nd                                | 1.5              | 27.6             | 29.1                      |
| 5% added on day 12  | 0.9 ± 0.1c                  | nd                                | nd                                | 6.5 ± 2.3d                  | 18.2 ± 8.8c                       | nd                                | 0.9              | 24.7             | 25.5                      |
| 10% added on day 12 | 1.0 ± 0.2c                  | nd                                | nd                                | 9.1 ± 4.7d                  | 17.9 ± 3.4c                       | nd                                | 1.0              | 27.1             | 28.1                      |
| 15% added on day 12 | 0.6 ± 0.1c                  | nd                                | nd                                | 8.5 ± 4.1d                  | 19.5 ± 4.2c                       | nd                                | 0.6              | 28.0             | 28.6                      |

Note: *n*-Dodecane was applied at 5%, 10% and 15% on days 0, 3, 6, 9 and 12 of culture, respectively. The period of culture lasted for 15 days. "C12" means palmarumycin C<sub>12</sub>, "C13" means palmarumycin C<sub>13</sub>. "CK" means the control without any organic solvents. "-" means not applicable. "nd" means not detectable. "0-1" means that the solvent was applied at 5% on day 0. The values are expressed as means ± standard deviations (*n* = 3). Different letters indicate significant differences among the treatments in each column at *p* ≤ 0.05.

**Table S6.** Effects of *n*-hexadecane on palmarumycin production in liquid culture of *Berkleasium* sp. Dzf12.

| Treatment           | C12 Yield in Mycelia (mg/L) | C12 Yield in Aqueous Phase (mg/L) | C12 Yield in Organic Phase (mg/L) | C13 Yield in Mycelia (mg/L) | C13 Yield in Aqueous Phase (mg/L) | C13 Yield in Organic Phase (mg/L) | C12 Yield (mg/L) | C13 Yield (mg/L) | C12 Plus C13 Yield (mg/L) |
|---------------------|-----------------------------|-----------------------------------|-----------------------------------|-----------------------------|-----------------------------------|-----------------------------------|------------------|------------------|---------------------------|
| CK                  | 4.6 ± 1.6c                  | 0.0 ± 0.0c                        | -                                 | 10.6 ± 3.2a                 | 21.2 ± 6.2cde                     | -                                 | 4.6              | 31.8             | 36.4                      |
| 5% added on day 0   | 19.4 ± 5.2abc               | 8.1 ± 2.2bc                       | nd                                | 2.3 ± 0.9b                  | 42.9 ± 6.1ab                      | nd                                | 27.5             | 45.2             | 72.7                      |
| 10% added on day 0  | 25.9 ± 7.5ab                | 15.8 ± 5.2ab                      | nd                                | 4.0 ± 1.3b                  | 37.2 ± 9.7abcd                    | nd                                | 41.7             | 41.2             | 82.9                      |
| 15% added on day 0  | 16.9 ± 4.2bc                | 15.9 ± 4.7ab                      | nd                                | 3.8 ± 1.6b                  | 34.2 ± 4.8abcd                    | nd                                | 32.8             | 38.0             | 70.7                      |
| 5% added on day 3   | 17.6 ± 4.3bc                | 11.6 ± 3.1abc                     | nd                                | 4.8 ± 1.0ab                 | 46.8 ± 7.2a                       | nd                                | 29.2             | 51.6             | 80.8                      |
| 10% added on day 3  | 24.1 ± 6.8abc               | 12.2 ± 4.2abc                     | nd                                | 7.2 ± 2.9ab                 | 39.3 ± 5.5abc                     | nd                                | 36.3             | 46.4             | 82.7                      |
| 15% added on day 3  | 17.6 ± 3.9bc                | 9.4 ± 2.6abc                      | nd                                | 6.5 ± 2.1ab                 | 35.2 ± 6.2abcd                    | nd                                | 27.0             | 41.7             | 68.6                      |
| 5% added on day 6   | 23.8 ± 5.7abc               | 16.9 ± 5.4ab                      | nd                                | 5.0 ± 2.1ab                 | 36.7 ± 5.3abcd                    | nd                                | 40.7             | 41.7             | 82.4                      |
| 10% added on day 6  | 18.9 ± 4.9bc                | 6.1 ± 2.2bc                       | nd                                | 4.9 ± 1.8ab                 | 23.3 ± 8.8bcde                    | nd                                | 25.0             | 28.2             | 53.1                      |
| 15% added on day 6  | 18.2 ± 4.7bc                | 4.9 ± 1.7bc                       | nd                                | 4.5 ± 2.0ab                 | 22.6 ± 5.4bcde                    | nd                                | 23.1             | 27.1             | 50.1                      |
| 5% added on day 9   | 37.7 ± 8.7ab                | 9.5 ± 2.7abc                      | nd                                | 2.3 ± 0.9b                  | 18.2 ± 4.0de                      | nd                                | 47.2             | 20.5             | 67.7                      |
| 10% added on day 9  | 39.8 ± 7.6a                 | 10.7 ± 3.1abc                     | nd                                | 7.8 ± 2.0ab                 | 17.5 ± 8.1de                      | nd                                | 50.5             | 25.2             | 75.7                      |
| 15% added on day 9  | 31.0 ± 9.0ab                | 22.3 ± 6.2a                       | nd                                | 4.0 ± 1.3b                  | 11.4 ± 6.2e                       | nd                                | 53.3             | 15.3             | 68.6                      |
| 5% added on day 12  | 35.3 ± 7.1ab                | 11.2 ± 2.3abc                     | nd                                | 1.8 ± 1.0b                  | 10.1 ± 4.6e                       | nd                                | 46.5             | 11.9             | 58.5                      |
| 10% added on day 12 | 37.2 ± 4.2ab                | 13.1 ± 3.8ab                      | nd                                | 7.1 ± 2.0ab                 | 8.4 ± 3.0e                        | nd                                | 50.3             | 15.5             | 65.7                      |
| 15% added on day 12 | 27.1 ± 6.1ab                | 16.0 ± 5.4ab                      | nd                                | 3.8 ± 1.0b                  | 7.4 ± 2.7e                        | nd                                | 43.1             | 11.2             | 54.3                      |

Note: *n*-Hexadecane was applied at 5%, 10% and 15% on days 0, 3, 6, 9 and 12 of culture, respectively. The period of culture lasted for 15 days. "C12" means palmarumycin C<sub>12</sub>, "C13" means palmarumycin C<sub>13</sub>. "CK" means the control without any organic solvents. "-" means not applicable. "nd" means not detectable. The values are expressed as means ± standard deviations (*n* = 3). Different letters indicate significant differences among the treatments in each column at *p* ≤ 0.05.

**Table S7.** Effects of 1-hexadecene on palmarumycin production in liquid culture of *Berkleasium* sp. Dzf12.

| Treatment           | C12 Yield in Mycelia (mg/L) | C12 Yield in Aqueous Phase (mg/L) | C12 Yield in Organic Phase (mg/L) | C13 Yield in Mycelia (mg/L) | C13 Yield in Aqueous Phase (mg/L) | C13 Yield in Organic Phase (mg/L) | C12 Yield (mg/L) | C13 Yield (mg/L) | C12 Plus C13 Yield (mg/L) |
|---------------------|-----------------------------|-----------------------------------|-----------------------------------|-----------------------------|-----------------------------------|-----------------------------------|------------------|------------------|---------------------------|
| CK                  | 6.5 ± 2.9ab                 | nd                                | -                                 | 7.8 ± 3.0fg                 | 19.8 ± 6.2de                      | -                                 | 6.5              | 27.6             | 34.1                      |
| 5% added on day 0   | 3.6 ± 1.7ab                 | nd                                | nd                                | 13.3 ± 3.2efd               | 21.1 ± 5.8de                      | nd                                | 3.6              | 34.4             | 38.0                      |
| 10% added on day 0  | 2.7 ± 1.0ab                 | nd                                | nd                                | 14.5 ± 3.1defg              | 25.5 ± 6.1cde                     | nd                                | 2.7              | 39.9             | 42.5                      |
| 15% added on day 0  | 1.9 ± 1.0b                  | nd                                | nd                                | 7.1 ± 2.1g                  | 19.5 ± 3.3de                      | nd                                | 1.9              | 26.7             | 28.5                      |
| 5% added on day 3   | 3.3 ± 1.9ab                 | nd                                | nd                                | 24.3 ± 5.6bcdef             | 49.4 ± 9.1bc                      | nd                                | 3.3              | 73.7             | 77.1                      |
| 10% added on day 3  | 3.2 ± 1.6ab                 | nd                                | nd                                | 25.2 ± 6.0bcde              | 53.8 ± 11.0b                      | nd                                | 3.2              | 79.0             | 82.2                      |
| 15% added on day 3  | 2.4 ± 1.4ab                 | nd                                | nd                                | 11.9 ± 3.2efg               | 14.0 ± 3.8de                      | nd                                | 2.4              | 25.9             | 28.4                      |
| 5% added on day 6   | 3.3 ± 2.3ab                 | nd                                | nd                                | 33.7 ± 6.2abc               | 93.4 ± 12.6a                      | nd                                | 3.3              | 127.1            | 130.4                     |
| 10% added on day 6  | 2.5 ± 1.2ab                 | nd                                | nd                                | 37.2 ± 7.4ab                | 92.9 ± 14.0a                      | nd                                | 2.5              | 130.1            | 132.6                     |
| 15% added on day 6  | 6.0 ± 2.6ab                 | nd                                | nd                                | 11.8 ± 3.8efg               | 27.4 ± 4.6cde                     | nd                                | 6.0              | 39.3             | 45.3                      |
| 5% added on day 9   | 4.7 ± 1.9ab                 | nd                                | nd                                | 42.7 ± 9.5a                 | 89.6 ± 10.8a                      | nd                                | 4.7              | 132.3            | 137.0                     |
| 10% added on day 9  | 6.9 ± 2.7ab                 | nd                                | nd                                | 30.9 ± 5.5abcd              | 38.1 ± 6.6bcd                     | nd                                | 6.9              | 69.0             | 75.8                      |
| 15% added on day 9  | 4.8 ± 1.5ab                 | nd                                | nd                                | 20.7 ± 4.1bcdefg            | 13.9 ± 3.3de                      | nd                                | 4.8              | 34.5             | 39.3                      |
| 5% added on day 12  | 8.9 ± 2.9ab                 | nd                                | nd                                | 20.2 ± 4.6cdefg             | 24.0 ± 4.2de                      | nd                                | 8.9              | 44.2             | 53.1                      |
| 10% added on day 12 | 9.7 ± 3.1a                  | nd                                | nd                                | 19.5 ± 3.4cdefg             | 21.3 ± 4.2de                      | nd                                | 9.7              | 40.8             | 50.4                      |
| 15% added on day 12 | 7.1 ± 2.6ab                 | nd                                | nd                                | 14.6 ± 2.6defg              | 9.9 ± 3.3e                        | nd                                | 7.1              | 24.5             | 31.6                      |

Note: 1-Hexadecene was applied at 5%, 10% and 15% on days 0, 3, 6, 9 and 12 of culture, respectively. The period of culture lasted for 15 days. "C12" means palmarumycin C<sub>12</sub>, "C13" means palmarumycin C<sub>13</sub>. "CK" means the control without any organic solvents. "-" means not applicable. "nd" means not detectable. The values are expressed as means ± standard deviations (*n* = 3). Different letters indicate significant differences among the treatments in each column at *p* ≤ 0.05.

**Table S8.** Effects of liquid paraffin on palmarumycin production in liquid culture of *Berkleasium* sp. Dzf12.

| Treatment           | C12 Yield in Mycelia (mg/L) | C12 Yield in Aqueous Phase (mg/L) | C12 Yield in Organic Phase (mg/L) | C13 Yield in Mycelia (mg/L) | C13 Yield in Aqueous Phase (mg/L) | C13 Yield in Organic Phase (mg/L) | C12 Yield (mg/L) | C13 Yield (mg/L) | C12 Plus C13 Yield (mg/L) |
|---------------------|-----------------------------|-----------------------------------|-----------------------------------|-----------------------------|-----------------------------------|-----------------------------------|------------------|------------------|---------------------------|
| CK                  | 6.0 ± 3.0a                  | nd                                | -                                 | 8.8 ± 3.5d                  | 22.0 ± 8.2c                       | -                                 | 6.0              | 30.8             | 36.9                      |
| 5% added on day 0   | 10.5 ± 3.6a                 | nd                                | nd                                | 43.9 ± 9.8abc               | 77.9 ± 7.1a                       | nd                                | 10.5             | 121.8            | 132.2                     |
| 10% added on day 0  | 10.0 ± 3.9a                 | nd                                | nd                                | 52.5 ± 6.1a                 | 80.3 ± 12.3a                      | nd                                | 10.0             | 132.7            | 142.8                     |
| 15% added on day 0  | 9.2 ± 3.0a                  | nd                                | nd                                | 47.8 ± 10.2ab               | 84.7 ± 9.3a                       | nd                                | 9.2              | 132.4            | 141.6                     |
| 5% added on day 3   | 12.3 ± 4.1a                 | nd                                | nd                                | 40.6 ± 6.6abc               | 78.4 ± 7.9a                       | nd                                | 12.3             | 119.0            | 131.3                     |
| 10% added on day 3  | 11.2 ± 3.8a                 | nd                                | nd                                | 51.1 ± 8.3a                 | 83.0 ± 5.2a                       | nd                                | 11.2             | 134.1            | 145.3                     |
| 15% added on day 3  | 10.7 ± 3.2a                 | nd                                | nd                                | 36.6 ± 4.8abc               | 67.1 ± 9.7ab                      | nd                                | 10.7             | 103.7            | 114.4                     |
| 5% added on day 6   | 7.5 ± 2.7a                  | nd                                | nd                                | 47.3 ± 9.5abc               | 83.4 ± 9.2a                       | nd                                | 7.5              | 130.6            | 138.2                     |
| 10% added on day 6  | 6.3 ± 2.9a                  | nd                                | nd                                | 32.8 ± 6.1abc               | 87.8 ± 8.3a                       | nd                                | 6.3              | 120.6            | 126.9                     |
| 15% added on day 6  | 3.7 ± 1.9a                  | nd                                | nd                                | 30.2 ± 5.6abcd              | 73.6 ± 7.0a                       | nd                                | 3.7              | 103.9            | 107.6                     |
| 5% added on day 9   | 4.4 ± 1.8a                  | nd                                | nd                                | 26.0 ± 5.3bcd               | 60.3 ± 7.4ab                      | nd                                | 4.4              | 86.2             | 90.7                      |
| 10% added on day 9  | 5.3 ± 2.1a                  | nd                                | nd                                | 29.8 ± 7.1abcd              | 67.7 ± 11.4ab                     | nd                                | 5.3              | 97.6             | 102.9                     |
| 15% added on day 9  | 6.1 ± 2.9a                  | nd                                | nd                                | 32.0 ± 2.1abcd              | 62.5 ± 5.2ab                      | nd                                | 6.1              | 94.4             | 100.5                     |
| 5% added on day 12  | 7.7 ± 2.8a                  | nd                                | nd                                | 23.4 ± 6.4cd                | 41.9 ± 8.9bc                      | nd                                | 7.7              | 65.3             | 73.0                      |
| 10% added on day 12 | 6.9 ± 2.8a                  | nd                                | nd                                | 32.5 ± 8.5abc               | 32.3 ± 6.3c                       | nd                                | 6.9              | 64.8             | 71.7                      |
| 15% added on day 12 | 3.8 ± 1.9a                  | nd                                | nd                                | 27.1 ± 5.7bcd               | 33.3 ± 5.5c                       | nd                                | 3.8              | 60.4             | 64.2                      |

Note: Liquid paraffin was applied at 5%, 10% and 15% on days 0, 3, 6, 9 and 12 of culture, respectively. The period of culture lasted for 15 days. "C12" means palmarumycin C<sub>12</sub>, "C13" means palmarumycin C<sub>13</sub>. "CK" means the control without any organic solvents. "-" means not applicable. "nd" means not detectable. The values are expressed as means ± standard deviations (*n* = 3). Different letters indicate significant differences among the treatments in each column at *p* ≤ 0.05.

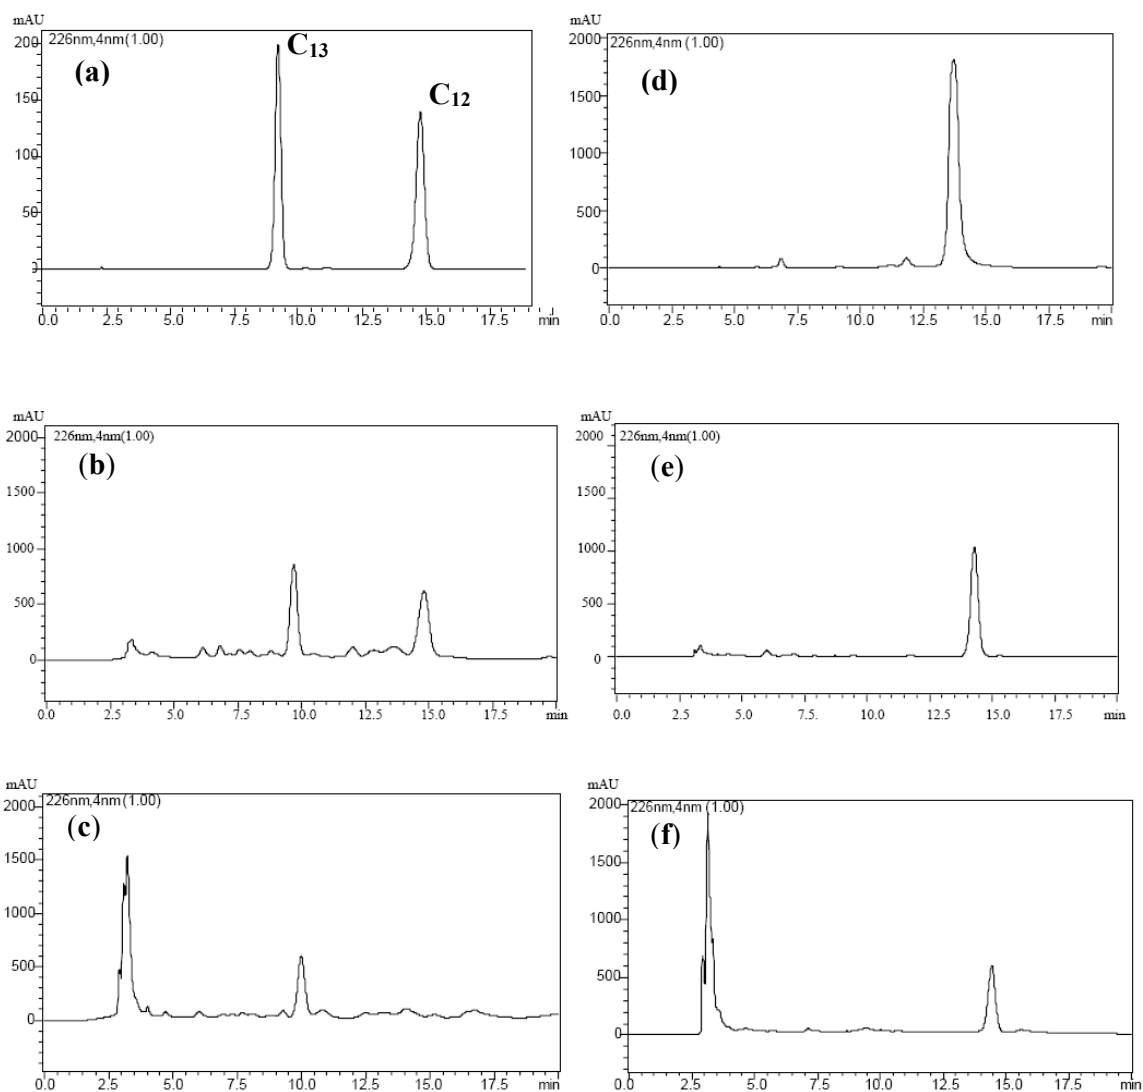

**Figure S1.** HPLC analysis of palmarumycin production in liquid culture of *Berkleasmium* sp. Dzf12 with oleic acid as the water-immiscible organic solvent. (a): Palmarumycins C<sub>12</sub> and C<sub>13</sub>; (b): Mycelia extract without addition of oleic acid; (c): Broth extract without addition of oleic acid; (d): Extract of oleic acid phase; (e): Mycelia extract with addition of oleic acid; (f): Broth extract with addition of oleic acid.
